# Supplementary material for: Cancer-associated hypersialylated MUC1 drives the differentiation of human monocytes into macrophages with a pathogenic phenotype
Source: PubMed Central journal article supplement (PMC7642421; doi:10.1038/s42003-020-01359-5), 2020-11-04
Supplement: 42003_2020_1359_MOESM1_ESM.pdf [file 42003_2020_1359_MOESM1_ESM.pdf]

**Cancer-associated hypersialylated MUC1 drives the differentiation of human monocytes into macrophages with a pathogenic phenotype**

**Richard Beatson<sup>1</sup>, Rosalind Graham<sup>1</sup>, Fabio Grundland Freile<sup>1</sup>, Domenico Cozzetto<sup>2</sup>, Shichina Kannambath<sup>3</sup>, Ester Pfeifer<sup>1</sup>, Natalie Woodman<sup>4</sup>, Julie Owen<sup>4</sup>, Rosamond Nuamah<sup>3</sup>, Ulla Mandel<sup>5</sup>, Sarah Pinder<sup>6</sup>, Cheryl Gillett<sup>4</sup>, Thomas Noll<sup>7</sup>, Ihssane Bouybayoune<sup>6</sup>, Joyce Taylor-Papadimitriou<sup>1</sup>, Joy M. Burchell<sup>1\*</sup>.**

**Supplementary figures 1-5 and Supplementary table 1**

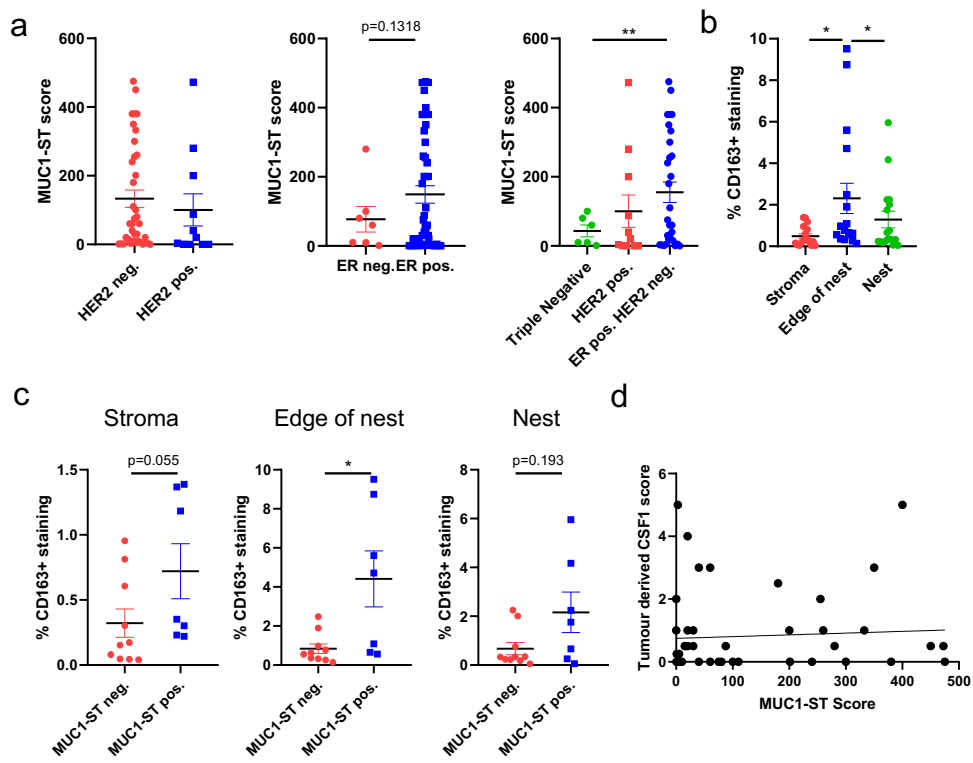

**Supplementary Figure 1.** Expression of MUC1-ST in breast cancer subtype and of MUC1-ST induced macrophages in tumour areas. **(a)** Pathological subtyping in relation to manual MUC1-ST scoring (n=53). **(b)** Visiopharm automated scoring; % CD163 staining in different regions of tumours (n=17). **(c)** Visiopharm automated scoring; % CD163 staining in MUC1-ST positive (manual score >5) or negative (manual score <5) tumours in the indicated regions (n=17). **(d)** Correlation between manual MUC1-ST score and manual tumour-derived CSF1 score (n=53). Standard error of mean shown. (a-b) \* $p < 0.05$ , \*\* $p < 0.01$  using unpaired t-test with Welch's correction owing to unequal population variance. (c) \* $p < 0.05$  Mann Whitney test (used as populations not Gaussian). Correlations were analysed using linear regression analysis (Pearson's).

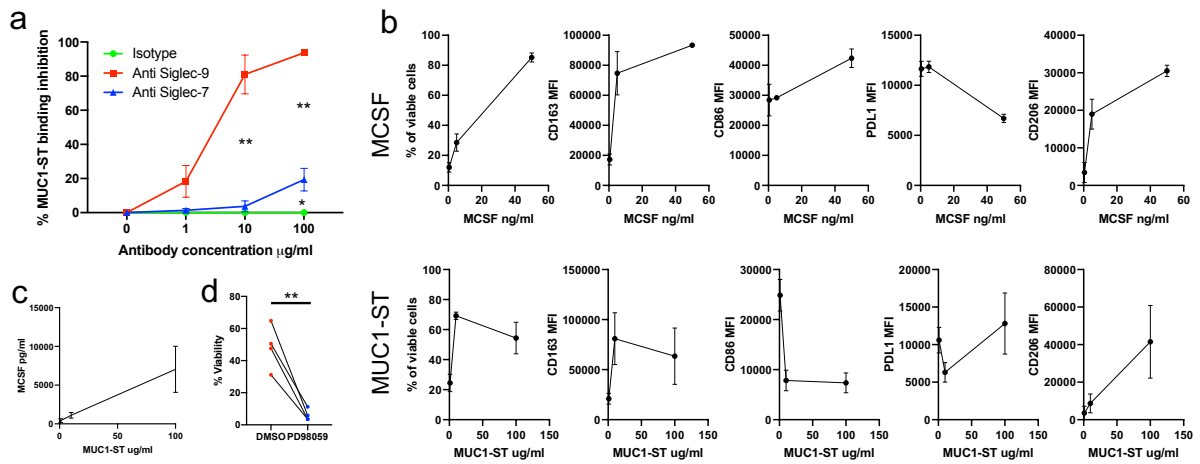

**Supplementary Figure 2.** Characterisation of MUC1-ST induced monocytes compared to MCSF monocytes and the effect of MEK/ERK inhibitor PD98059. **(a)** % MUC1-ST binding inhibition after pre-incubating monocytes with indicated antibodies at indicated concentrations (n=3). **(b)** The effect of different concentrations of MCSF (top row) and MUC1-ST (bottom row) on monocyte viability and phenotype (n=3). **(c)** The effect of different concentrations of MUC1-ST on MCSF release from monocytes at 48h (n=3). **(d)** Number and viability of monocytes cultured with MUC1-ST for 7 days in serum-free media after pre-incubation with PD98059 or vehicle (n=4). Standard error of mean shown and paired t-test used for statistical analysis. \*p<0.05 \*\*p<0.01.

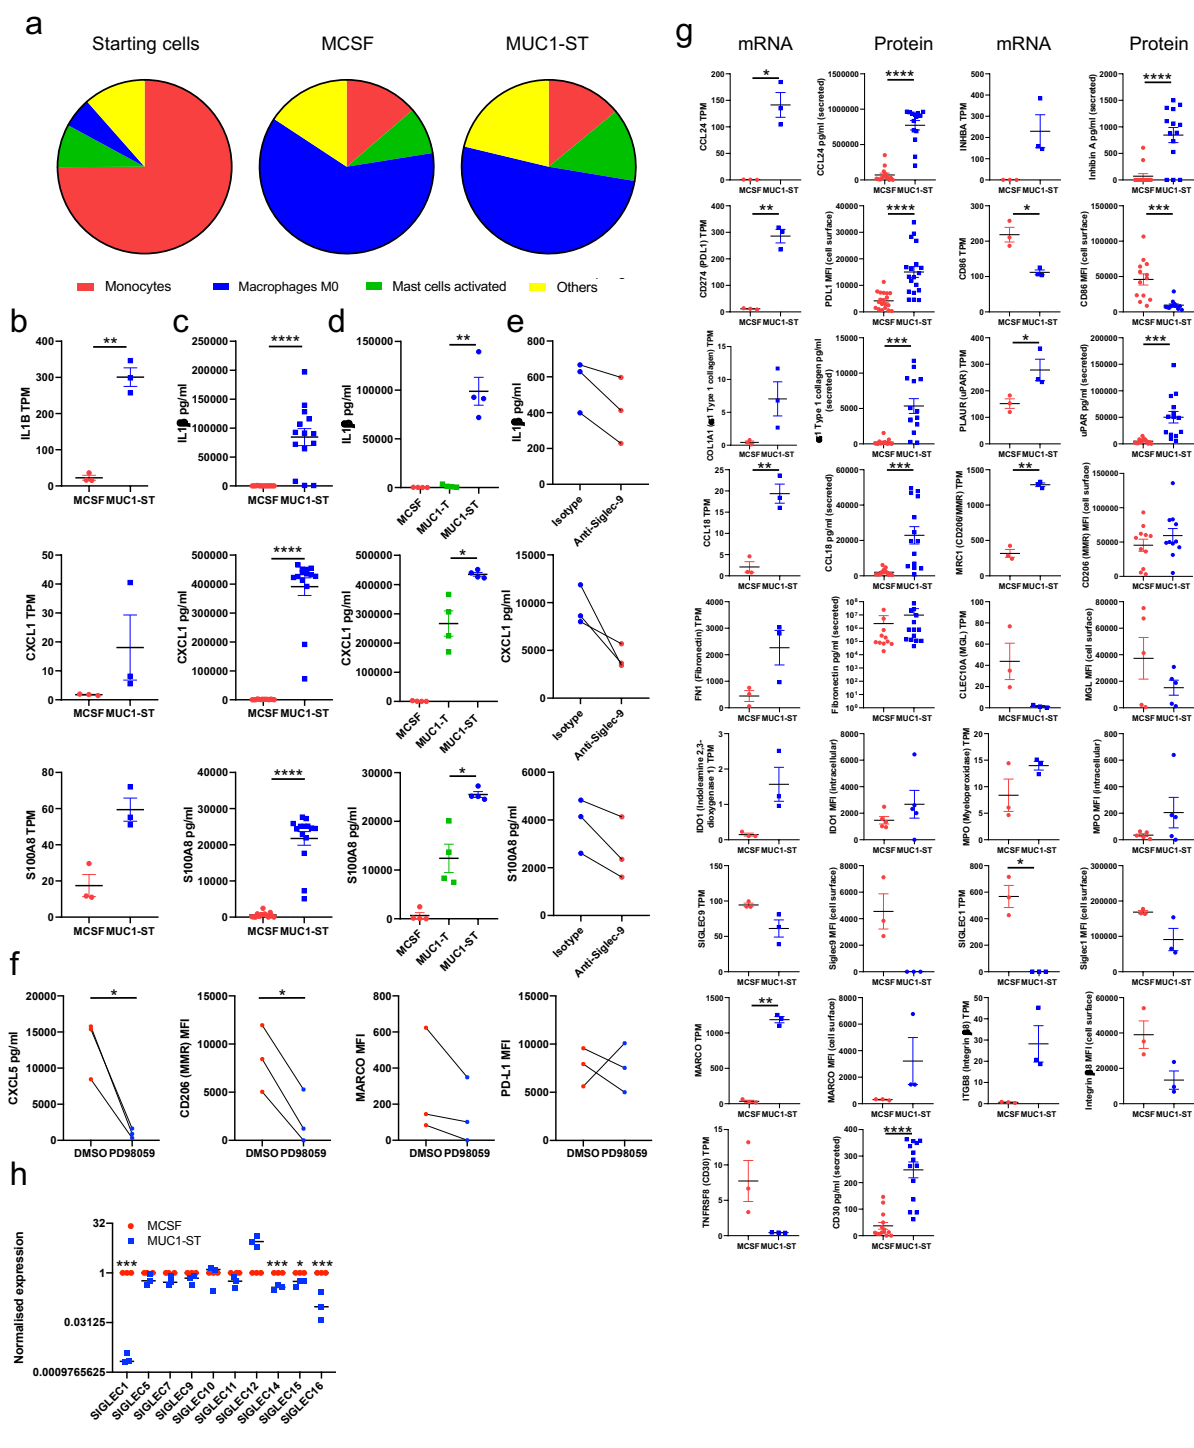

**Supplementary Figure 3.** Characterisation of MUC1-ST macrophages. **(a)** Determination of immune cell subtype by applying CIBERSORT to starting monocytes (n=2) and monocytes treated with MCSF (n=3) or MUC1-ST (n=3) for 7 days **(b,c,d,e)**. Three genes that are differentially expressed between MCSF macrophages and MUC1-ST macrophages **(b)** at the RNA level (n=3), **(c)** and at the protein level (n=14). **(d)** The same 3 proteins assessed in monocytes treated with desialylated MUC1-ST (MUC1-T) (n=4). **(e)** the effect of pre-incubation of monocytes with anti-Siglec-9 or isotype control, prior to MUC1-ST addition, on the production of these 3 proteins (n=3). **(f)** Assessment of an additional 17 proteins whose genes were differentially expressed between MCSF macrophages and MUC1-ST macrophages (n=3-14). **(g)** Levels of CXCL5 in the supernatant and CD206, MARCO and PD-L1 on live macrophages after incubation with PD98059 (a MEK/ERK inhibitor) prior to addition of MUC1-ST and culture for 7 days (n=3). **(h)** Siglec transcript expression levels in monocytes treated with MCSF (n=3) or MUC1-ST (n=3) for 7 days. Standard error of means shown. \*p<0.05 \*\*p<0.01 \*\*\*p<0.001, \*\*\*\*p<0.0001 using paired t-test. TPM; transcripts per million. MFI. Mean fluorescence intensity

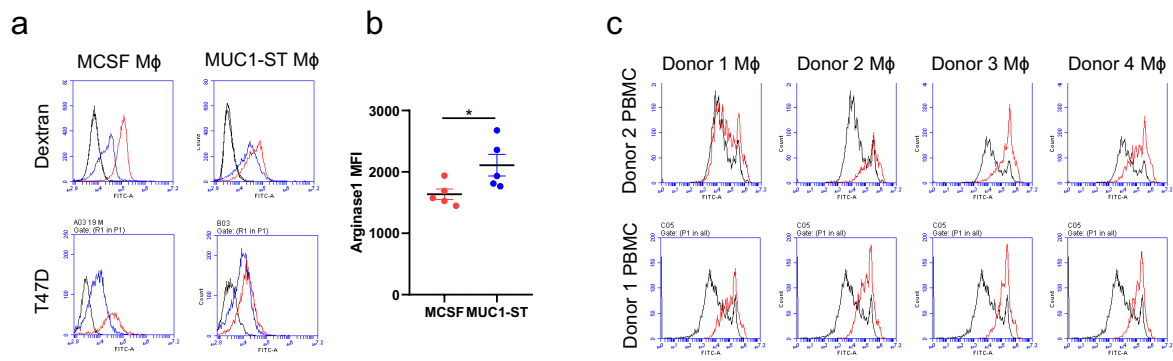

**Supplementary Figure 4.** Functional characterisation of MUC1-ST induced macrophages. **(a)** representative histograms showing dextran-FITC uptake (top; blue; 4C. red; 37C) and the uptake of labelled T47D tumour cells (bottom; blue; 4C. red; 37C) by MCSF macrophages and MUC1-ST macrophages after 4h incubation, against macrophages alone (black). **(b)** intracellular staining of arginase in MCSF macrophages and MUC1-ST macrophages (n=5). **(c)** representative histograms showing the effect of media alone (black) or MUC1-ST (red) macrophage supernatant on the proliferation of CD3 stimulated PBMCs after 4 days. Standard error of mean shown, \*p<0.05 using paired t-test.

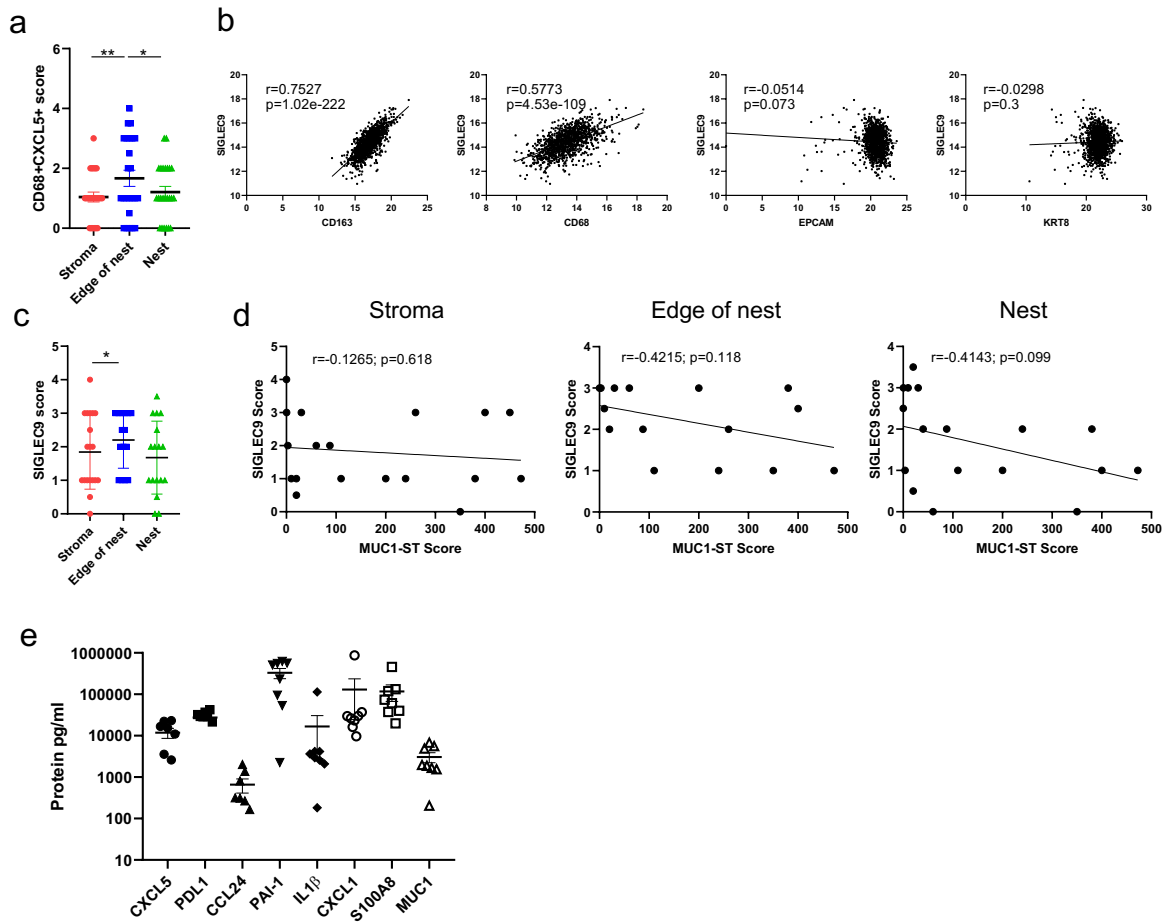

**Supplementary Figure 5.** Location of macrophages and Siglec-9 expression within the tumour. **(a)** Manual scoring of CD68+CXCL5+ cells in different indicated regions of the tumour (n=24). **(b)** TCGA data showing the correlation between SIGLEC9 and CD163, CD68, and EPCAM and KRT8 expression levels in breast cancers (n=1217). **(c)** Manual scoring of SIGLEC9+ cells in different indicated regions of the tumour (stroma n=18, edge n=15, nest n=17). **(d)** SIGLEC9 manual scores in different indicated regions of the tumour measured against MUC1-ST manual scoring (stroma n=18, edge n=15, nest n=17). **(e)** Measurement of indicated factors in the interstitial fluid of fresh breast cancers (n=8). Standard error of the mean shown and paired t-test used \* $p<0.05$ , \*\* $p<0.01$ . Correlations were analysed using linear regression analysis (Pearson's).

| Antigen       | Clone      | Host species | Subtype | Conjugate       | Company      | Catalogue number |
|---------------|------------|--------------|---------|-----------------|--------------|------------------|
| Arginase1     | A1exF5     | Rat          | IgG2a   | PerCP           | ebioscience  | 46-3697-81       |
| CD11b         | ICRF44     | mouse        | IgG1    | APC             | Biolegend    | 301309           |
| CD14          | M5E2       | mouse        | IgG2a   | FITC            | Biolegend    | 301804           |
| CD15          | HI98       | mouse        | IgM     | PE              | Biolegend    | 301906           |
| CD16          | B73.1      | mouse        | IgG1    | FITC            | Biolegend    | 360715           |
| CD163         | MRQ-26     | mouse        | IgG1    | Unconjugated    | Roche        | 760-4437         |
| CD163         | GHI-61     | mouse        | IgG1    | FITC            | Biolegend    | 333618           |
| CD206         | 15-2       | mouse        | IgG1    | PerCP           | Biolegend    | 321122           |
| CD3           | OKT3       | mouse        | IgG2a   | Unconjugated    | Biolegend    | 317325           |
| CD30          | BY88       | mouse        | IgG1    | PE              | Biolegend    | 333906           |
| CD38          | HIT2       | mouse        | IgG1    | PE              | Biolegend    | 303505           |
| CD66b         | G10F5      | mouse        | IgM     | PerCP           | Biolegend    | 305108           |
| CD68          | KP1        | mouse        | IgG1    | Unconjugated    | Roche        | 790-2931         |
| CD68          | KP1        | mouse        | IgG1    | Unconjugated    | ebioscience  | 14-0688-82       |
| CD86          | IT2.2      | mouse        | IgG2b   | PE              | Biolegend    | 305406           |
| CXCL5         | Polyclonal | goat         | IgG     | Unconjugated    | Biotechne    | AF254            |
| Goat IgG      | Polyclonal | donkey       | IgG     | NL557           | Biotechne    | NL001            |
| IDO1          | eyedio     | mouse        | IgG1    | PE              | ebioscience  | 12-9477-41       |
| Integrin 8    | 416922     | mouse        | IgG2b   | Unconjugated    | Biotechne    | MAB4775          |
| MARCO         | PLK-1      | mouse        | IgG3    | PE              | ebioscience  | 12-5447-41       |
| MCSF          | A16067H    | mouse        | IgG2b   | Unconjugated    | Biolegend    | 699203           |
| MGL           | H037G3     | mouse        | IgG2a   | PE              | Biolegend    | 354704           |
| Mouse Ig      | Polyclonal | rabbit       | Ig      | HRP             | DAKO         | P0260            |
| Mouse Ig      | Polyclonal | goat         | Ig      | HRP             | DAKO         | P0447            |
| Mouse Ig      | Polyclonal | rabbit       | Ig      | FITC            | DAKO         | F0261            |
| Mouse IgG     | Polyclonal | donkey       | IgG     | Alexa Fluor 488 | ThermoFisher | A-21202          |
| MPO           | MPO455-8E6 | mouse        | IgG1    | FITC            | ebioscience  | 11-1299-41       |
| MUC1-T        | 1B9        | mouse        | IgG1    | Unconjugated    | NA           | NA               |
| NA            | MOPC-21    | mouse        | IgG1    | PerCP           | Biolegend    | 400148           |
| NA            | MOPC-21    | mouse        | IgG1    | FITC            | Biolegend    | 400108           |
| NA            | MOPC-21    | mouse        | IgG1    | Unconjugated    | Biolegend    | 400124           |
| NA            | MOPC-21    | mouse        | IgG1    | PE              | Biolegend    | 400112           |
| NA            | MOPC-21    | mouse        | IgG1    | APC             | Biolegend    | 400120           |
| NA            | MOPC-173   | mouse        | IgG2a   | FITC            | Biolegend    | 400210           |
| NA            | MG2a-53    | mouse        | IgG2a   | Unconjugated    | Biolegend    | 401504           |
| NA            | MOPC-173   | mouse        | IgG2a   | PerCP           | Biolegend    | 400250           |
| NA            | MOPC-173   | mouse        | IgG2a   | PE              | Biolegend    | 400214           |
| NA            | RTK2758    | rat          | IgG2a   | PerCP           | Biolegend    | 400529           |
| NA            | MPC-11     | mouse        | IgG2b   | Unconjugated    | Biolegend    | 400347           |
| NA            | MPC-11     | mouse        | IgG2b   | PerCP           | Biolegend    | 400336           |
| NA            | 20116      | mouse        | IgG2b   | Unconjugated    | Biotechne    | MAB004           |
| NA            | MPC-11     | mouse        | IgG2b   | PE              | Biolegend    | 400314           |
| NA            | MG3-35     | mouse        | IgG3    | PE              | Biolegend    | 401319           |
| NA            | MM-30      | mouse        | IgM     | PerCP           | Biolegend    | 401623           |
| NA            | MM-30      | mouse        | IgM     | PE              | Biolegend    | 401611           |
| PDL1          | 29E.2A3    | mouse        | IgG2b   | PerCP           | Biolegend    | 329738           |
| Siglec 1      | HSn 7D2    | mouse        | IgG1    | Unconjugated    | Abcam        | Ab18619          |
| Siglec 9      | 191240     | mouse        | IgG2a   | Unconjugated    | Biotechne    | MAB1139          |
| Siglec 9      | 191240     | mouse        | IgG2a   | FITC            | Biotechne    | FAB1139F         |
| Tissue Factor | NY2        | mouse        | IgG1    | APC             | Biolegend    | 365205           |

Supplementary Table 1: Antibodies used in the study
