# Supplementary material for: Cancer-associated hypersialylated MUC1 drives the differentiation of human monocytes into macrophages with a pathogenic phenotype
Source: PubMed Central journal article supplement (PMC7642421; doi:10.1038/s42003-020-01359-5), 2020-11-04
Supplement: 42003_2020_1359_MOESM3_ESM.pdf [file 42003_2020_1359_MOESM3_ESM.pdf]

## **Description of Additional Supplementary Files File**

**Name:** Supplementary Data 1

**Description:** RNAseq data

**Name:** Supplementary Data 2

**Description:** Data for figures in main text
